# Supplementary material for: Differential DNA methylation patterns in whole blood from ACPA-positive patients with DMARD-naïve rheumatoid arthritis at clinical disease onset
Source: Front Immunol. 2025 Jul 21;16:1488161. doi: 10.3389/fimmu.2025.1488161 (PMC12318994; doi:10.3389/fimmu.2025.1488161)
Supplement: Supplementary file 8 [file Table5.xlsx]

## Sheet: Supplementary Table 5
Supplemenatry table 5 : 91 DMRs for the main effect of smoking
	chr	start	end	value	area	cluster	indexStart	indexEnd	L	clusterL	p.value	fwer	p.valueArea	fwerArea
1360	chr6	32014663	32017261	-0.203738017	0.407476033	341766	290644	290688	45	60	1.00E-05	0.015	0.004495298	0.93
619	chr9	131016135	131016224	0.335667833	0.671335667	414259	430023	430025	3	3	2.34E-05	0.03	7.68E-05	0.085
1017	chr17	43412082	43412082	-0.527564912	0.527564912	172242	709876	709876	1	1	0.000297237	0.3	0.000667949	0.46
908	chr15	90624655	90625595	-0.183995831	0.367991662	143295	644618	644622	5	9	0.000440846	0.43	0.008850326	0.99
1193	chr21	34578205	34578205	-0.477154142	0.477154142	253723	809387	809387	1	1	0.000758122	0.525	0.001479507	0.695
967	chr16	84862964	84862964	-0.467233098	0.467233098	159609	680283	680283	1	1	0.000911751	0.575	0.00170995	0.725
1292	chr4	670734	670828	-0.209204409	0.418408817	292935	193344	193345	2	4	0.001025302	0.59	0.003783932	0.92
840	chr12	133308663	133310221	-0.103507641	0.207015283	105537	570199	570211	13	16	0.000574436	0.61	0.132467671	1
1004	chr17	19193909	19193909	-0.442658111	0.442658111	167022	698191	698191	1	1	0.001536283	0.715	0.002531527	0.82
930	chr16	8986092	8986092	-0.439292037	0.439292037	148168	656853	656853	1	5	0.001619777	0.735	0.002671797	0.85
971	chr16	87989507	87989507	-0.433304075	0.433304075	160959	683256	683256	1	1	0.001830181	0.77	0.002975713	0.875
1320	chr5	976058	976058	-0.432178449	0.432178449	312519	230088	230088	1	2	0.001860238	0.775	0.00301913	0.875
1377	chr6	58777390	58778072	-0.129834976	0.259669953	346766	303361	303365	5	8	0.00118561	0.79	0.05633483	1
1143	chr2	176624628	176624628	-0.412092739	0.412092739	229991	124812	124812	1	1	0.002748611	0.86	0.004161323	0.93
1350	chr5	178209272	178209272	-0.399539627	0.399539627	334661	271068	271068	1	6	0.003516752	0.895	0.005113151	0.95
836	chr12	132107825	132107825	-0.385921185	0.385921185	104990	568449	568449	1	5	0.004552073	0.94	0.006422331	0.975
1286	chr3	171501025	171501025	-0.362312751	0.362312751	288188	184556	184556	1	1	0.007397537	0.98	0.009742038	0.99
1337	chr5	159797813	159797918	-0.087190253	0.174380505	331680	265365	265368	4	13	0.003109303	0.98	0.216238511	1
488	chr4	189972428	189972887	0.139856596	0.279713191	311960	228730	228731	2	2	0.004745779	0.985	0.040457679	1
1041	chr18	13004337	13004337	-0.360632322	0.360632322	183184	733815	733815	1	1	0.007631319	0.99	0.010019237	0.995
942	chr16	56945735	56945735	-0.355847534	0.355847534	154678	670098	670098	1	1	0.00840948	0.99	0.01090427	0.995
968	chr16	84993018	84993018	-0.35506589	0.35506589	159663	680359	680359	1	1	0.008586486	0.99	0.011094635	0.995
1080	chr19	39684710	39684710	-0.354381853	0.354381853	199974	768525	768525	1	1	0.008713396	0.99	0.011238244	0.995
279	chr17	72199173	72199173	0.353665772	0.353665772	177740	720585	720585	1	17	0.008830287	0.99	0.011365154	0.995
999	chr17	17409003	17409003	-0.35186482	0.35186482	166475	697055	697055	1	1	0.009157583	0.99	0.011739206	0.995
1086	chr19	43025476	43025476	-0.350089755	0.350089755	201057	771144	771144	1	1	0.009461499	0.99	0.012069841	0.995
804	chr11	118501494	118501502	-0.135048433	0.270096866	80982	520056	520057	2	2	0.005133189	0.99	0.047461125	1
188	chr14	105415856	105416582	0.088654048	0.177308096	130294	618957	618959	3	3	0.004345009	0.99	0.207141044	1
378	chr20	42574624	42574624	0.343587936	0.343587936	246687	796147	796147	1	9	0.010677167	0.995	0.013469194	0.995
1180	chr20	60885270	60885270	-0.340534292	0.340534292	251172	804164	804164	1	5	0.011331757	0.995	0.014203938	1
1291	chr4	669236	669236	-0.337115276	0.337115276	292934	193340	193340	1	22	0.012109918	1	0.015092311	1
426	chr3	39322775	39322775	0.336537825	0.336537825	271799	154107	154107	1	14	0.012226809	1	0.01522924	1
1005	chr17	25289407	25289407	-0.334988512	0.334988512	167674	699520	699520	1	5	0.01260754	1	0.015663407	1
1295	chr4	3365442	3365442	-0.330933223	0.330933223	294017	196412	196412	1	6	0.013689617	1	0.016845677	1
381	chr20	56269979	56269979	0.330822328	0.330822328	249894	801850	801850	1	3	0.013736374	1	0.016892433	1
125	chr12	7624557	7624557	0.330692233	0.330692233	86461	531268	531268	1	2	0.013773111	1	0.01693251	1
242	chr16	83979981	83979981	0.329461722	0.329461722	159274	679555	679555	1	3	0.014087047	1	0.017289863	1
518	chr6	28480974	28480974	0.326947083	0.326947083	340669	282905	282905	1	36	0.014821791	1	0.018108101	1
1070	chr19	19654180	19654180	-0.324851304	0.324851304	197258	762495	762495	1	1	0.015322753	1	0.018685877	1
936	chr16	31055627	31055627	-0.321828017	0.321828017	152419	665443	665443	1	1	0.016157689	1	0.019607647	1
1266	chr3	50228871	50228871	-0.317664994	0.317664994	274090	159216	159216	1	2	0.017533665	1	0.021117212	1
722	chr10	71319983	71319983	-0.317615581	0.317615581	49860	454634	454634	1	1	0.017570402	1	0.021157289	1
830	chr12	111760976	111760976	-0.317131388	0.317131388	100478	558992	558992	1	3	0.01773071	1	0.021317596	1
1319	chr5	89919	89919	-0.312125994	0.312125994	312129	229019	229019	1	2	0.019383884	1	0.023121059	1
1002	chr17	18302510	18302510	-0.311119355	0.311119355	166840	697840	697840	1	1	0.019737897	1	0.02350847	1
1239	chr22	39919237	39919237	-0.310882029	0.310882029	263064	828097	828097	1	3	0.019818051	1	0.023598643	1
294	chr19	2188889	2188889	0.310287529	0.310287529	191255	748129	748129	1	3	0.020021775	1	0.023829085	1
686	chr1	151741997	151741997	-0.30931547	0.30931547	23976	49737	49737	1	2	0.020375788	1	0.024209816	1
555	chr7	24436742	24436742	0.308808438	0.308808438	363537	336400	336400	1	1	0.020556134	1	0.02441688	1
970	chr16	85750743	85750743	-0.307940791	0.307940791	160052	681254	681254	1	1	0.02088009	1	0.024764214	1
1257	chr3	13129679	13129679	-0.305067158	0.305067158	268367	148302	148302	1	2	0.022082398	1	0.026070055	1
16	chr1	28920491	28920491	0.304176804	0.304176804	9039	20021	20021	1	1	0.022399674	1	0.026427407	1
96	chr11	46294375	46294375	0.30183996	0.30183996	69246	494969	494969	1	2	0.023384899	1	0.027499466	1
724	chr10	72136907	72136907	-0.301587333	0.301587333	50109	455089	455089	1	5	0.023495111	1	0.027616357	1
702	chr1	221051188	221051188	-0.299721451	0.299721451	35315	71699	71699	1	19	0.024353425	1	0.028538127	1
44	chr1	168058993	168058993	0.299574017	0.299574017	27544	57817	57817	1	4	0.024413541	1	0.028601582	1
1031	chr17	74577390	74577390	-0.297953762	0.297953762	178671	722976	722976	1	1	0.025161644	1	0.02941648	1
1335	chr5	135168067	135168067	-0.295451767	0.295451767	327170	256402	256402	1	1	0.026350593	1	0.030712301	1
819	chr12	42681908	42681908	-0.292127596	0.292127596	90405	538499	538499	1	4	0.028073902	1	0.032535802	1
1432	chr8	22410931	22410931	-0.292025674	0.292025674	386118	380826	380826	1	3	0.028137357	1	0.032605937	1
501	chr5	144608744	144608744	0.29134202	0.29134202	329162	260860	260860	1	3	0.028531447	1	0.033030084	1
109	chr11	67068059	67068059	0.289982813	0.289982813	73075	504660	504660	1	6	0.029242813	1	0.033801566	1
696	chr1	204170872	204170872	-0.289605089	0.289605089	32443	66463	66463	1	3	0.029449877	1	0.03400863	1
1479	chr9	139259726	139259726	-0.285996214	0.285996214	417065	435037	435037	1	12	0.031527199	1	0.036246259	1
591	chr8	70166555	70166555	0.28571623	0.28571623	392135	392049	392049	1	3	0.031714225	1	0.036443304	1
853	chr13	114284038	114284038	-0.283198121	0.283198121	116454	590735	590735	1	3	0.033143636	1	0.037976248	1
666	chr1	46379179	46379179	-0.282183844	0.282183844	13390	29028	29028	1	3	0.033821604	1	0.038677594	1
514	chr6	11649444	11649444	0.281016998	0.281016998	337782	277280	277280	1	3	0.034546329	1	0.039465774	1
1422	chr7	158211035	158211035	-0.28073753	0.28073753	382121	372667	372667	1	1	0.034776771	1	0.039706236	1
82	chr11	195674	195674	0.280208373	0.280208373	61849	478534	478534	1	5	0.035107406	1	0.040063589	1
477	chr4	121471288	121471288	0.279805439	0.279805439	305424	217157	217157	1	2	0.035407983	1	0.040377525	1
673	chr1	59044320	59044320	-0.279203163	0.279203163	15614	33344	33344	1	14	0.035835471	1	0.040825051	1
1427	chr8	7572749	7572749	-0.278881488	0.278881488	383748	376358	376358	1	1	0.03597908	1	0.040975339	1
429	chr3	47210162	47210162	0.278309661	0.278309661	273308	157148	157148	1	1	0.036379849	1	0.041392808	1
810	chr12	3251138	3251138	-0.27586934	0.27586934	85320	528540	528540	1	1	0.038096479	1	0.043166212	1
316	chr19	40906607	40906607	0.27430129	0.27430129	200356	769453	769453	1	1	0.039228652	1	0.044371861	1
1408	chr7	100200677	100200677	-0.274137102	0.274137102	373318	355189	355189	1	3	0.039332184	1	0.044478732	1
1256	chr3	13034632	13034632	-0.272623734	0.272623734	268325	148220	148220	1	3	0.040434301	1	0.045624265	1
1339	chr5	172305242	172305242	-0.271994	0.271994	333179	267953	267953	1	2	0.040818371	1	0.046035054	1
1471	chr9	134293793	134293793	-0.270549125	0.270549125	415288	431944	431944	1	1	0.041863712	1	0.04714051	1
206	chr15	52325560	52325560	0.270322745	0.270322745	135752	630188	630188	1	4	0.042047398	1	0.047330875	1
1462	chr9	117157871	117157871	-0.269471029	0.269471029	411839	425971	425971	1	1	0.042635193	1	0.047948728	1
1145	chr2	217204775	217204775	-0.268507238	0.268507238	234474	132968	132968	1	1	0.043426713	1	0.048783665	1
785	chr11	67382913	67382913	-0.268102676	0.268102676	73224	505178	505178	1	9	0.043710591	1	0.049077562	1
451	chr3	158368670	158368670	0.266823945	0.266823945	286980	182484	182484	1	1	0.044685797	1	0.050096185	1
276	chr17	60707121	60707121	0.264358046	0.264358046	175570	716878	716878	1	1	0.046652907	1	0.052150128	1
308	chr19	17558604	17558604	0.263242372	0.263242372	196402	760449	760449	1	1	0.047554638	1	0.053088597	1
1406	chr7	100043970	100043970	-0.263240457	0.263240457	373262	355004	355004	1	1	0.047557978	1	0.053091937	1
1223	chr22	29705157	29705157	-0.262128165	0.262128165	260448	822729	822729	1	3	0.048422972	1	0.053986988	1
1347	chr5	177376611	177376611	-0.261383513	0.261383513	334368	270509	270509	1	3	0.049144357	1	0.054735091	1
1096	chr19	51130408	51130408	-0.261342308	0.261342308	203634	777482	777482	1	1	0.049184434	1	0.054775168	1
